anesthetized with ether who received no drug. Likewise, the response to endogenous carbon dioxide in surgical patients during ether anesthesia was not appreciably altered by either *N*-allylnormorphine or levallorphan administered intravenously in therapeutic doses. In other words, neither drug causes a notable degree of stimulation or depression of respiration when used in patients who have been given a narcotic as premedication and anesthetized with ether.

Merck Sharp & Dohme supplied the *N*-allylnormorphine (Nalline) and Hoffmann-LaRoche, Inc., the levallorphan (Lorfan) used in this study.

#### REFERENCES

1. Goodman, L., and Gilman, A.: *The Pharmacological Basis of Therapeutics*, (ed. 2.) The Macmillan Company, 1954, p. 254.
2. Hamilton, W. K., and Cullen, S. C.: Effects of Levallorphan Upon Opiate Induced Respiratory Depression, *ANESTHESIOLOGY* 14: 550 (Nov.) 1953.
3. Eckenhoff, J. E., Elder, J. D., and King, B. D.: Effect of *N*-Allyl Normorphine in Treatment of Opiate Overdosage, *Am. J. M. Sc.* 223: 191 (Feb.) 1952.
4. Huggins, R. A., and Moyer, J. H.: Effects of Nalorphine in Normal Human Subjects and Review of Literature, *ANESTHESIOLOGY* 16: 82 (Jan.) 1955.
5. Wikler, A.: Effects of Large Doses of *N*-Allyl Normorphine on Man, *Fed. Proc.* 10: 345 (March) 1951.
6. Adriani, J.: Combatting Narcotic Induced Respiratory Depression in Surgery, *Merck Report* 62: 27 (April) 1953.
7. Eckenhoff, J. E., Hoffman, G. L., and Funderberg, L. W.: *N*-Allyl Normorphine: Antagonist to Neonatal Narcosis Produced by Sedation of Parturient, *Am. J. Obst. & Gynec.* 65: 269 (June) 1953.
8. Adriani, J., and Kerr, M.: Clinical Experiences in Use of *N*-Allylnormorphine (Nalline) As Antagonist to Morphine and Other Narcotics in Surgical Patients, *Surgery* 33: 731 (May) 1953.

---

#### ELEVENTH NEW YORK POSTGRADUATE ASSEMBLY

The Eleventh Postgraduate Assembly of the New York State Society of Anesthesiologists will be held in the Hotel New Yorker, New York City, December 10-14, 1957.

The House of Delegates will meet on December 10.

Scientific Sessions and Round Table Luncheons are scheduled for December 11 and 13.

Hospital Clinics have been arranged in various Hospitals in the New York metropolitan Area for December 12.

The Residents' program will be presented on December 14.
